# Supplementary material
Source: PubMed Central journal article supplement (PMC4356211)
Supplement: NIHMS667719-supplement-Supp_Appendix.pdf [file NIHMS667719-supplement-Supp_Appendix.pdf]

## Appendix: Additional Numerical Results

Table 5: Simulation for a continuous response under the transformation model. AR(0.8) correlation structure and Error 1. In each cell, AUC based on 100 replicates (mean in the first row, standard deviation in the second row).

|              | $t^{1/3}$ | $t$   | $t^3$ | $t^5$ |
|--------------|-----------|-------|-------|-------|
| SPRE         | 0.805     | 0.828 | 0.828 | 0.831 |
|              | 0.057     | 0.049 | 0.041 | 0.054 |
| Single Index | 0.752     | 0.767 | 0.614 | 0.551 |
|              | 0.102     | 0.063 | 0.077 | 0.053 |

Table 6: Analysis of the lung cancer data using PeAFT: identified main effects and interactions.

| Gene name        | main effects |         |         |        |         |         | interactions |         |       |       |        |
|------------------|--------------|---------|---------|--------|---------|---------|--------------|---------|-------|-------|--------|
|                  | age          | gender  | smoke   | chemo  | stage   | gene    | age          | gender  | smoke | chemo | stage  |
| <i>CDC2</i>      | 0.0020       | -0.0058 | -0.0082 | 0.0367 | -0.0511 | -0.0004 |              |         |       |       |        |
| <i>CDK1</i>      | 0.0016       | -0.0057 | -0.0089 | 0.0370 | -0.0505 | -0.0027 |              |         |       |       |        |
| <i>UBE2C</i>     | 0.0016       | -0.0061 | -0.0085 | 0.0373 | -0.0509 | -0.0025 |              |         |       |       |        |
| <i>TIMP3</i>     | 0.0016       | -0.0059 | -0.0080 | 0.0364 | -0.0517 | 0.0039  |              |         |       |       |        |
| <i>PFKP</i>      | 0.0020       | -0.0058 | -0.0081 | 0.0366 | -0.0512 | -0.0000 |              |         |       |       |        |
| <i>CDC2</i>      | 0.0013       | -0.0057 | -0.0090 | 0.0370 | -0.0502 | -0.0040 |              |         |       |       |        |
| <i>CCNB2</i>     | 0.0009       | -0.0058 | -0.0101 | 0.0368 | -0.0491 | -0.0070 |              |         |       |       |        |
| <i>CCNA2</i>     | 0.0018       | -0.0060 | -0.0086 | 0.0369 | -0.0506 | -0.0026 |              |         |       |       |        |
| <i>TXNIP</i>     | 0.0019       | -0.0057 | -0.0082 | 0.0367 | -0.0510 | 0.0008  |              |         |       |       |        |
| <i>AFP</i>       | 0.0030       | -0.0073 | -0.0079 | 0.0341 | -0.0516 |         | 0.0098       |         |       |       |        |
| <i>ANXA3</i>     | 0.0009       | -0.0058 | -0.0081 | 0.0364 | -0.0510 |         | -0.0033      |         |       |       |        |
| <i>KCTD12</i>    | 0.0018       | -0.0060 | -0.0079 | 0.0367 | -0.0512 |         | -0.0010      |         |       |       |        |
| <i>DPT</i>       | 0.0012       | -0.0064 | -0.0072 | 0.0363 | -0.0510 |         | -0.0052      |         |       |       | 0.0046 |
| <i>HIST1H2AC</i> | 0.0022       | -0.0065 | -0.0082 | 0.0377 | -0.0516 |         |              | 0.0059  |       |       |        |
| <i>ETV1</i>      | 0.0014       | -0.0054 | -0.0091 | 0.0370 | -0.0514 |         |              |         |       |       |        |
| <i>HIST1H2BC</i> | 0.0024       | -0.0058 | -0.0082 | 0.0370 | -0.0512 |         |              |         |       |       | 0.0044 |
| <i>DPT</i>       | 0.0011       | -0.0062 | -0.0072 | 0.0360 | -0.0512 |         | -0.0061      |         |       |       |        |
| <i>MFAP4</i>     | 0.0017       | -0.0055 | -0.0078 | 0.0369 | -0.0513 |         | -0.0030      |         |       |       |        |
| <i>DPT</i>       | 0.0019       | -0.0059 | -0.0081 | 0.0366 | -0.0512 |         | -0.0008      |         |       |       |        |
| <i>SDC2</i>      | 0.0025       | -0.0055 | -0.0089 | 0.0362 | -0.0501 |         |              | 0.0041  |       |       |        |
| <i>QKI</i>       | 0.0020       | -0.0059 | -0.0080 | 0.0368 | -0.0511 |         | -0.0008      |         |       |       |        |
| <i>TTRAP</i>     | 0.0019       | -0.0060 | -0.0081 | 0.0370 | -0.0518 |         |              | -0.0020 |       |       |        |
| <i>FRMD4B</i>    | 0.0000       | -0.0072 | -0.0080 | 0.0364 | -0.0517 |         | -0.0098      |         |       |       |        |
| <i>OSTM1</i>     | 0.0020       | -0.0061 | -0.0078 | 0.0367 | -0.0510 |         | -0.0012      |         |       |       |        |
| <i>HIST1H2BH</i> | 0.0022       | -0.0057 | -0.0082 | 0.0369 | -0.0512 |         |              |         |       |       | 0.0016 |
| <i>HIST1H2BD</i> | 0.0020       | -0.0058 | -0.0081 | 0.0366 | -0.0512 |         |              |         |       |       | 0.0000 |
| <i>RDX</i>       | 0.0016       | -0.0053 | -0.0081 | 0.0364 | -0.0501 |         | -0.0035      |         |       |       |        |
| <i>SMARCA2</i>   | 0.0028       | -0.0066 | -0.0077 | 0.0368 | -0.0519 |         | -0.0031      |         |       |       |        |

Table 7: Analysis of the lung cancer data using PeCOX: identified main effects and interactions.

| gene name       | main effects |         |         |        |        |      | interactions |        |       |       |         |  |
|-----------------|--------------|---------|---------|--------|--------|------|--------------|--------|-------|-------|---------|--|
|                 | age          | gender  | smoke   | chemo  | stage  | gene | age          | gender | smoke | chemo | stage   |  |
| <i>PDZK1IP1</i> | 0.3718       | -0.1070 | -0.1224 | 0.1410 | 0.7556 |      |              |        |       |       | -0.0384 |  |
| <i>GSTA1</i>    | 0.3782       | -0.1362 | -0.1051 | 0.1308 | 0.7582 |      |              |        |       |       | -0.0501 |  |
| <i>IGFBP1</i>   | 0.3679       | -0.1200 | -0.1097 | 0.1371 | 0.7522 |      |              |        |       |       | -0.0141 |  |
| <i>AFP</i>      | 0.3624       | -0.1144 | -0.1133 | 0.1449 | 0.7375 |      |              |        |       |       | -0.0017 |  |
| <i>CPB2</i>     | 0.3630       | -0.1155 | -0.1128 | 0.1437 | 0.7385 |      |              |        |       |       | -0.0031 |  |
| <i>AHCYL2</i>   | 0.3779       | -0.1156 | -0.1177 | 0.1482 | 0.7538 |      |              |        |       |       | -0.0401 |  |
| <i>FST</i>      | 0.3663       | -0.1165 | -0.1130 | 0.1426 | 0.7422 |      | 0.0109       |        |       |       | -0.0217 |  |
| <i>LEPREL1</i>  | 0.3686       | -0.1244 | -0.1073 | 0.1340 | 0.7491 |      |              |        |       |       | -0.0955 |  |
| <i>RAB25</i>    | 0.3957       | -0.1312 | -0.1125 | 0.1200 | 0.7880 |      |              |        |       |       | -0.0059 |  |
| <i>PAH</i>      | 0.3649       | -0.1165 | -0.1121 | 0.1426 | 0.7418 |      |              |        |       |       | 0.0064  |  |
| <i>IGF2BP2</i>  | 0.3648       | -0.1140 | -0.1145 | 0.1463 | 0.7395 |      |              |        |       |       | 0.0385  |  |
| <i>UGCG</i>     | 0.3698       | -0.1243 | -0.1063 | 0.1321 | 0.7591 |      |              |        |       |       | -0.0180 |  |
| <i>SLC16A4</i>  | 0.3703       | -0.1152 | -0.1115 | 0.1418 | 0.7484 |      |              |        |       |       | -0.0126 |  |
| <i>ACE2</i>     | 0.3689       | -0.1189 | -0.1124 | 0.1416 | 0.7477 |      |              |        |       |       | 0.0029  |  |
| <i>GPR183</i>   | 0.3630       | -0.1149 | -0.1129 | 0.1447 | 0.7383 |      |              |        |       |       | 0.0931  |  |
| <i>CSE1L</i>    | 0.3665       | -0.1220 | -0.1081 | 0.1281 | 0.7731 |      |              |        |       |       | -0.0590 |  |
| <i>MAL</i>      | 0.3757       | -0.1288 | -0.1007 | 0.1202 | 0.7743 |      |              |        |       |       | -0.0143 |  |
| <i>CBR3</i>     | 0.3687       | -0.1196 | -0.1117 | 0.1413 | 0.7494 |      |              |        |       |       | -0.0554 |  |
| <i>CEACAM7</i>  | 0.3904       | -0.1354 | -0.0998 | 0.1153 | 0.7932 |      |              |        |       |       | -0.0021 |  |
| <i>RIT1</i>     | 0.3629       | -0.1149 | -0.1128 | 0.1441 | 0.7382 |      |              |        |       |       | -0.0161 |  |
| <i>SCUBE2</i>   | 0.3672       | -0.1192 | -0.1110 | 0.1428 | 0.7432 |      |              |        |       |       | -0.0248 |  |
| <i>SPINK4</i>   | 0.3699       | -0.1196 | -0.1112 | 0.1368 | 0.7483 |      |              |        |       |       | 0.0073  |  |
| <i>PLAGL1</i>   | 0.3630       | -0.1152 | -0.1132 | 0.1436 | 0.7387 |      |              |        |       |       | -0.0208 |  |
| <i>HSD17B2</i>  | 0.3693       | -0.1209 | -0.1121 | 0.1384 | 0.7464 |      |              |        |       |       | -0.0317 |  |
| <i>ADHIC</i>    | 0.3754       | -0.1315 | -0.1077 | 0.1316 | 0.7655 |      |              |        |       |       | -0.0070 |  |
| <i>FAT1</i>     | 0.3658       | -0.1160 | -0.1126 | 0.1433 | 0.7419 |      |              |        |       |       |         |  |
| <i>TDP2</i>     | 0.3803       | -0.1189 | -0.1117 | 0.1328 | 0.7686 |      | 0.0404       |        |       |       |         |  |
| <i>SCML1</i>    | 0.3865       | -0.1331 | -0.1076 | 0.1292 | 0.7597 |      |              |        |       |       | 0.0556  |  |
| <i>ACE2</i>     | 0.3634       | -0.1151 | -0.1132 | 0.1444 | 0.7385 |      |              |        |       |       | -0.0027 |  |
| <i>UPK1B</i>    | 0.3640       | -0.1164 | -0.1122 | 0.1432 | 0.7407 |      |              |        |       |       | -0.0044 |  |
| <i>PCNA</i>     | 0.3625       | -0.1164 | -0.1108 | 0.1413 | 0.7467 |      |              |        |       |       | 0.0381  |  |
| <i>CDH17</i>    | 0.3624       | -0.1146 | -0.1130 | 0.1443 | 0.7375 |      |              |        |       |       | -0.0014 |  |
| <i>BMP6</i>     | 0.3850       | -0.1320 | -0.1057 | 0.1279 | 0.7695 |      |              |        |       |       | -0.0420 |  |

Table 8: Analysis of the lung cancer data using Sig (the significance level method): identified main effects and interactions.

| Gene name       | main effects |        |       |       |       |       | interactions |        |       |       |       |
|-----------------|--------------|--------|-------|-------|-------|-------|--------------|--------|-------|-------|-------|
|                 | age          | gender | smoke | chemo | stage | gene  | age          | gender | smoke | chemo | stage |
| <i>PRSS3</i>    | -1.00        | -0.06  | 1.79  | -0.24 | -3.13 | -2.96 |              |        |       |       |       |
| <i>KLK6</i>     | -1.00        | -0.13  | 0.54  | -0.32 | -1.86 | -1.69 |              |        |       |       |       |
| <i>KIAA1199</i> | -1.00        | 0.36   | 0.22  | -0.29 | -2.76 | 1.43  |              |        |       |       | 1.25  |
| <i>TANK</i>     | -1.00        | 0.16   | 0.51  | -0.84 | -2.52 | 1.88  | -2.50        |        |       |       |       |
| <i>CPM</i>      | -1.00        | 0.07   | 0.72  | -0.44 | -1.41 | 0.97  |              |        |       | -1.41 |       |
| <i>SERPIND1</i> | -1.00        | -0.20  | 0.38  | -0.25 | -0.81 | 1.72  |              |        |       |       |       |
| <i>RET</i>      | -1.00        | 0.37   | -0.06 | -0.11 | -2.15 | -1.94 |              |        |       |       |       |
| <i>CLDN18</i>   | -1.00        | 0.59   | 0.98  | -0.40 | -2.74 | -1.49 |              |        |       |       |       |
| <i>MUC5AC</i>   | -1.00        | 0.22   | 0.02  | -0.97 | -1.78 | -1.74 |              |        |       |       |       |
| <i>ABAT</i>     | -1.00        | 0.00   | 0.48  | -0.58 | -0.76 | 1.43  |              |        |       |       |       |

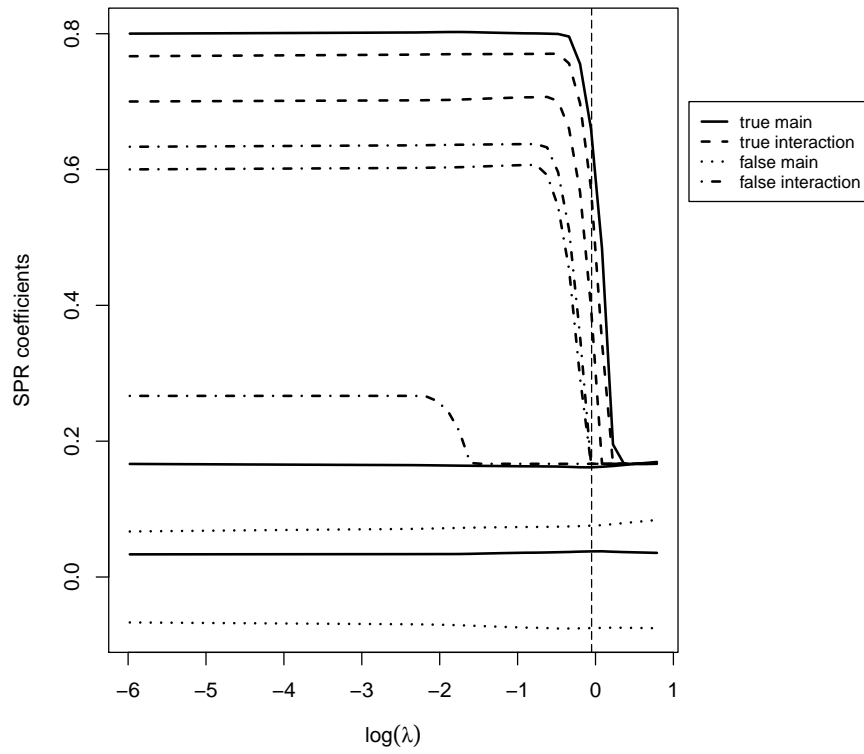

Figure 1: Parameter paths for a gene *with* important interactions. The vertical line corresponds to  $\lambda$  selected using 2-fold cross validation.

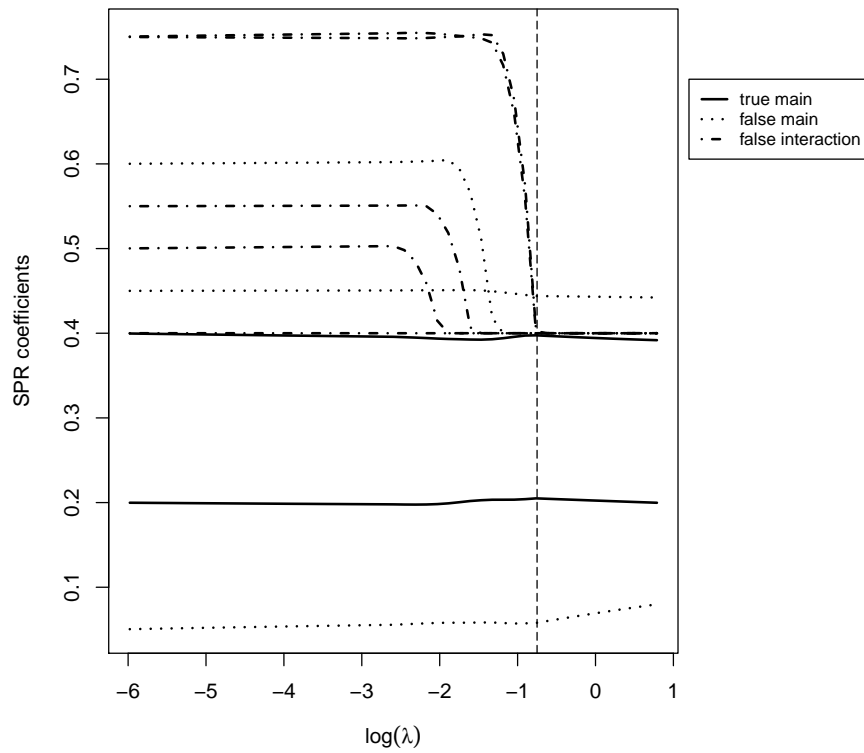

Figure 2: Parameter paths for a gene *without* important interaction. The vertical line corresponds to  $\lambda$  selected using 2-fold cross validation.
